# Supplementary material for: Defensive reflexes in people with pain – a biomarker of the need to protect? A meta-analytical systematic review
Source: publisher site journal article supplement (doi:10.1515/revneuro-2016-0057), 2017-02-11
Supplement: Supplementary file 2 [file ROB_Supplementary_material.pdf › ROB_Supplementary_material.pdf]

# Risk of Bias Assessment

|                                                                                                                                                                                                                               |                |              |          |  |
|-------------------------------------------------------------------------------------------------------------------------------------------------------------------------------------------------------------------------------|----------------|--------------|----------|--|
| <b>Study Number:</b>                                                                                                                                                                                                          | <b>Author:</b> | <b>Year:</b> |          |  |
| <b>REVIEWER:</b>                                                                                                                                                                                                              |                |              |          |  |
| <b>Selection Bias</b>                                                                                                                                                                                                         | <b>BIASED</b>  | <b>NOT</b>   | <b>?</b> |  |
| Representativeness of cases<br>(participant recruitment)                                                                                                                                                                      |                |              |          |  |
| Baseline characteristics of the groups are similar (i.e. there are no systematic differences or participant is own control)                                                                                                   |                |              |          |  |
| Comments:                                                                                                                                                                                                                     |                |              |          |  |
|                                                                                                                                                                                                                               |                |              |          |  |
| <b>Detection Bias</b>                                                                                                                                                                                                         | <b>BIASED</b>  | <b>NOT</b>   | <b>?</b> |  |
| Diagnosis made according to recognised criteria (e.g. IASP 1994 – pain greater than 3 months, Budapest criteria for CRPS 2010, American college of Rheumatologist classification of RA 2010) OR a specific a priori criteria. |                |              |          |  |
| Ensured controls were appropriately assessed to fulfil the role of being a ‘control’                                                                                                                                          |                |              |          |  |
| Comments:                                                                                                                                                                                                                     |                |              |          |  |
|                                                                                                                                                                                                                               |                |              |          |  |
| <b>Statistical Methods and Study Size (<i>Reporting bias</i>)</b>                                                                                                                                                             | <b>BIASED</b>  | <b>NOT</b>   | <b>?</b> |  |
| Was the method of determining study size described and appropriate (a priori sample size calculations – power) OR was the sample size for each group in excess of 30 persons?                                                 |                |              |          |  |
| Were the confounding variables controlled for? (e.g. by study design, such as <b>matched controls</b> , or statistical analysis)                                                                                              |                |              |          |  |
| Were methods used to examine subgroups and interactions described and appropriate?                                                                                                                                            |                |              |          |  |
| n/a <input type="checkbox"/>                                                                                                                                                                                                  |                |              |          |  |
| Comments:                                                                                                                                                                                                                     |                |              |          |  |
|                                                                                                                                                                                                                               |                |              |          |  |

| <b>Missing Data (<i>Reporting bias</i>)</b>                                                                                              | <b>BIASED</b> | <b>NOT</b> | <b>?</b> |
|------------------------------------------------------------------------------------------------------------------------------------------|---------------|------------|----------|
| Are all outcomes and groups actually reported (e.g. compare aims, methods, and results to make sure)                                     |               |            |          |
| Were methods for dealing with missing data described and appropriate?<br><br>n/a <input type="checkbox"/>                                |               |            |          |
| Comments:                                                                                                                                |               |            |          |
|                                                                                                                                          |               |            |          |
| <b>Methodological bias</b>                                                                                                               | <b>BIASED</b> | <b>NOT</b> | <b>?</b> |
| Were outcome assessors blinded to group status if possible or relevant?<br><br>Blinded <input type="checkbox"/>                          |               |            |          |
| Valid and reliable measures used for assessment of clinical pain?                                                                        |               |            |          |
| Are the protocols for assessing and processing the reflex reported?<br>(such as sampling rate, amplification, filtering, skin prep, etc) |               |            |          |
| Comments:                                                                                                                                |               |            |          |
|                                                                                                                                          |               |            |          |
